# Supplementary material for: Predictors of Liver Fat and Stiffness in Non-Alcoholic Fatty Liver Disease (NAFLD) – an 11-Year Prospective Study
Source: PubMed Central journal article supplement (PMC5674024; doi:10.1038/s41598-017-14706-0), 2017-11-06
Supplement: 41598_2017_14706_MOESM1_ESM.pdf [file 41598_2017_14706_MOESM1_ESM.pdf]

## **SUPPLEMENTARY MATERIAL**

### **PREDICTORS OF LIVER FAT AND STIFFNESS IN NON-ALCOHOLIC FATTY LIVER DISEASE (NAFLD) – AN 11-YEAR PROSPECTIVE STUDY**

Susanna Lallukka<sup>1,2</sup>, Sanja Sädevirta<sup>1,2</sup>, Markus T. Kallio<sup>1,2</sup>, Panu K. Luukkonen<sup>1,2</sup>, You Zhou<sup>1,3</sup>, Antti Hakkarainen<sup>4</sup>, Nina Lundbom<sup>4</sup>, Marju Orho-Melander<sup>5</sup>, Hannele Yki-Järvinen<sup>1,2</sup>

*<sup>1</sup>Minerva Foundation Institute for Medical Research, Helsinki, Finland; <sup>2</sup>Department of Medicine, University of Helsinki, and Helsinki University Hospital, Helsinki, Finland; <sup>3</sup>Systems Immunity University Research Institute and Division of Infection and Immunity, School of Medicine, Cardiff University, Cardiff, United Kingdom; <sup>4</sup>HUS Medical Imaging Center, Helsinki University Hospital, Helsinki, Finland; <sup>5</sup>Department of Clinical Sciences, Diabetes and Endocrinology, University Hospital Malmö, Lund University, Malmö, Sweden*

**Supplementary Table 1.** Pearson's correlation coefficients between changes in clinical and biochemical characteristics during a follow-up and liver fat content at 11 years.

|                                        | <i>r</i> | p-value |
|----------------------------------------|----------|---------|
| <b>Body composition</b>                |          |         |
| Change in liver fat content (log)      | 0.348    | 0.001   |
| Change in waist circumference (cm)     | 0.311    | 0.003   |
| Change in BMI (kg/m <sup>2</sup> )     | 0.242    | 0.021   |
| Change in body weight (kg)             | 0.209    | 0.046   |
| Change in waist-to-hip ratio           | 0.186    | 0.086   |
| Change in body fat (log)               | -0.135   | 0.20    |
| <b>Measures of glucose homeostasis</b> |          |         |
| Change in HbA <sub>1C</sub> (log)      | 0.284    | 0.007   |
| Change in HOMA-IR (log)                | 0.268    | 0.019   |
| Change in fS-insulin (log)             | 0.242    | 0.034   |
| Change in fP-glucose (log)             | 0.023    | 0.83    |
| <b>Liver enzymes</b>                   |          |         |
| Change in P-ALT (log)                  | 0.330    | 0.001   |
| Change in P-AST (log)                  | -0.020   | 0.85    |
| Change in AST/ALT ratio (log)          | -0.010   | 0.93    |
| Change in P-GGT (log)                  | 0.161    | 0.16    |
| <b>Lipids</b>                          |          |         |
| Change in fP-HDL cholesterol (log)     | 0.016    | 0.88    |
| Change in fP-LDL cholesterol (mmol/L)  | -0.112   | 0.30    |
| Change in fP-Triglycerides (log)       | 0.050    | 0.64    |
| Change in fS-FFA (mmol/L)              | 0.108    | 0.34    |
| Change in blood leukocyte count (log)  | 0.233    | 0.026   |

Abbreviations: ALT, alanine aminotransferase; AST, aspartate aminotransferase; BMI, body mass index; FFA, free fatty acid; fP, fasting plasma; fS, fasting serum; GGT, gamma-glutamyl transferase; HbA<sub>1C</sub>, glycosylated hemoglobin A<sub>1C</sub>; HDL, high-density lipoprotein; HOMA-IR, homeostasis model assessment of insulin resistance; LDL, low-density lipoprotein; P, plasma; *r*, correlation coefficient.

| <b>Supplementary Table 2.</b> Multiple linear regression models to predict liver fat content at 11.3 years |                |        |       |         |       |
|------------------------------------------------------------------------------------------------------------|----------------|--------|-------|---------|-------|
|                                                                                                            | Adjusted $R^2$ | B      | SE    | P-value | Beta  |
| <i>'All baseline parameters' (Model 1)*</i>                                                                | 0.65, p<0.001  |        |       |         |       |
| Baseline liver fat (log)                                                                                   |                | 0.823  | 0.065 | <0.001  | 0.809 |
| Constant                                                                                                   |                | 0.047  | 0.059 | 0.424   |       |
| <i>'Baseline parameters except for liver fat' (Model 2)#</i>                                               | 0.41, p<0.001  |        |       |         |       |
| Baseline HOMA-IR (log)                                                                                     |                | 0.703  | 0.174 | <0.001  | 0.390 |
| Baseline P-ALT (log)                                                                                       |                | 0.529  | 0.196 | 0.008   | 0.256 |
| Baseline age (years)                                                                                       |                | 0.016  | 0.005 | 0.002   | 0.273 |
| Constant                                                                                                   |                | -1.100 | 0.364 | 0.003   |       |
| <i>'All baseline parameters and changes except for liver fat' (Model 3)°</i>                               | 0.74, p<0.001  |        |       |         |       |
| Baseline liver fat (log)                                                                                   |                | 0.797  | 0.058 | <0.001  | 0.784 |
| Change in BMI (kg)                                                                                         |                | 0.062  | 0.012 | <0.001  | 0.283 |
| Change in HbA <sub>1C</sub> (fold-change, log)                                                             |                | 2.475  | 0.821 | 0.003   | 0.173 |
| Constant                                                                                                   |                | 0.062  | 0.012 | 0.82    | 0.173 |

\*Model 1 ('All baseline parameters') included baseline age, BMI, waist circumference, P-ALT (log), fP-triglyceride (log), blood leukocyte count (log), HOMA-IR (log) and liver fat content (log).

#Model 2 ('Baseline parameters except for liver fat') included parameters in Model 1 except for baseline liver fat content.

°Model 3 ('All baseline and changes except for liver fat') included parameters in Model 1 and changes in BMI, waist circumference, HbA<sub>1C</sub>, (fold-change, log) and blood leukocyte count (fold-change, log).

ALT, alanine aminotransferase; B, unstandardized coefficient; Beta, standardized coefficient; BMI, body mass index; HbA<sub>1C</sub>, glycosylated hemoglobin A<sub>1C</sub>; HOMA-IR, homeostasis model assessment of insulin resistance; log, logarithmic transformed; P, plasma;  $R^2$ , coefficient of determination; SE, standard error for unstandardized coefficient.

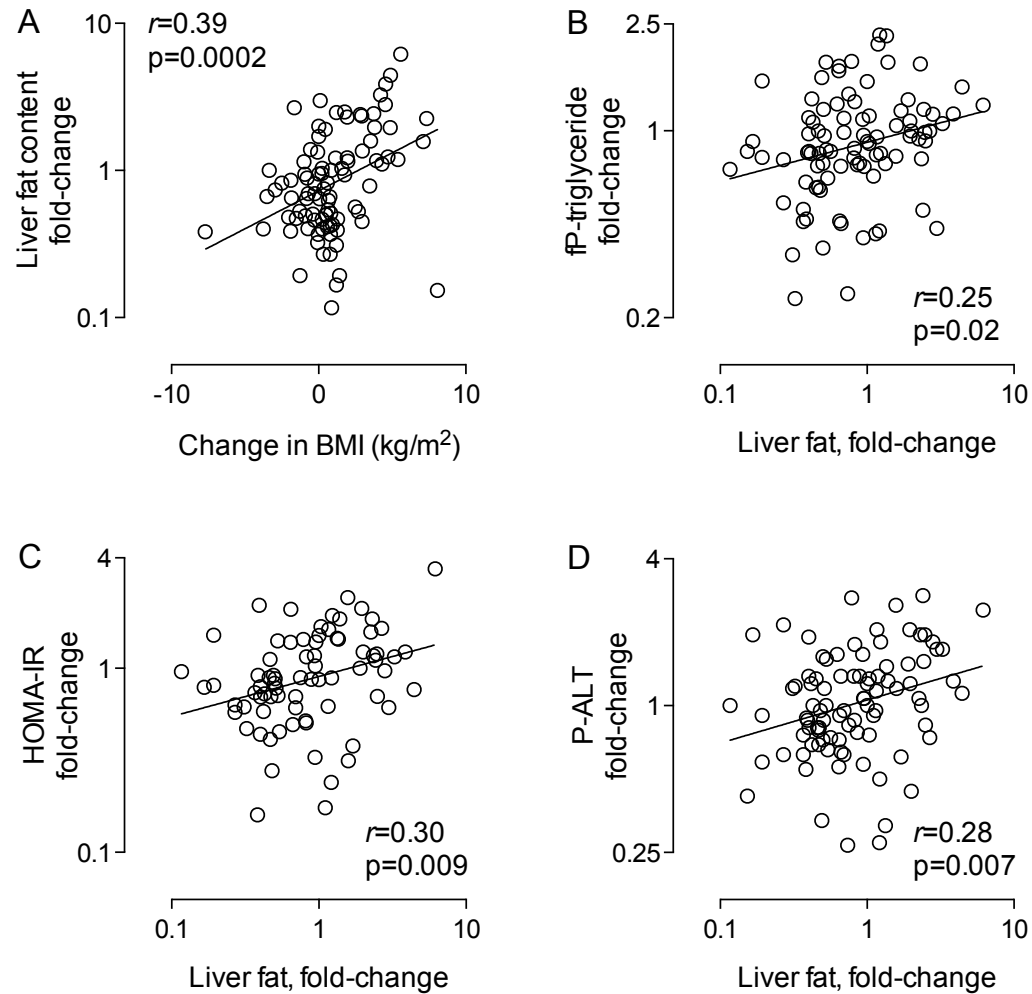

**Supplementary Figure 1.** The relationships (Pearson's correlation coefficients,  $r$ ) between change in liver fat content (log, fold-change) measured by <sup>1</sup>H-MRS and changes in (A) BMI, (B) fP-triglycerides (log, fold-change), (C) HOMA-IR (log, fold-change) and (D) P-ALT (log, fold-change). Abbreviations: ALT, alanine aminotransferase; BMI, body mass index; fP, fasting plasma; HOMA-IR, homeostasis model assessment of insulin resistance; <sup>1</sup>H-MRS, proton magnetic resonance spectroscopy; P, plasma.
